# Supplementary material for: The GIEMS-MethaneCentric database: a dynamic and comprehensive global product of methane-emitting aquatic areas
Source: Copernicus journal article supplement (doi:10.5194/essd-2024-466), 2024-10-17
Supplement: Supplementary file 1 [file essd-2024-466-supplement.pdf]

# The GIEMS-MethaneCentric database: a dynamic and comprehensive global product of methane-emitting aquatic areas

Juliette Bernard<sup>1,2</sup>, Catherine Prigent<sup>1,3</sup>, Carlos Jimenez<sup>3,1</sup>, Etienne Fluet-Chouinard<sup>4</sup>, Bernhard Lehner<sup>5</sup>, Elodie Salmon<sup>2</sup>, Philippe Ciais<sup>2</sup>, Zhen Zhang<sup>6</sup>, Shushi Peng<sup>7</sup>, and Marielle Saunois<sup>2</sup>

<sup>1</sup>LERMA, Paris Observatory, CNRS, PSL, Paris, France

<sup>2</sup>Laboratoire des Sciences du Climat et de l'Environnement, CEA-CNRS-UVSQ, Gif-sur-Yvette, France

<sup>3</sup>Estellus, Paris, France

<sup>4</sup>Earth System Sciences Division, Pacific Northwest National Laboratory, Richland, WA, USA

<sup>5</sup>Department of Geography, McGill University, Montreal, QC H3A 0B9, Canada

<sup>6</sup>Institute of Tibetan Plateau Research, Chinese Academy of Sciences, Beijing, China

<sup>7</sup>College of Urban and Environmental Sciences, Peking University, Beijing 100871, China

**Correspondence:** Juliette Bernard ([juliette.bernard@obspm.fr](mailto:juliette.bernard@obspm.fr)) and Catherine Prigent ([catherine.prigent@obspm.fr](mailto:catherine.prigent@obspm.fr))

| Class number | Class                                          |
|--------------|------------------------------------------------|
| 0            | Dryland (non-wetland)                          |
| 1            | Freshwater lake                                |
| 2            | Saline lake                                    |
| 3            | Reservoir                                      |
| 4            | Large river                                    |
| 5            | Large estuarine river                          |
| 6            | Other permanent waterbody                      |
| 7            | Small streams                                  |
| 8            | Lacustrine, forested                           |
| 9            | Lacustrine, non-forested                       |
| 10           | Riverine, regularly flooded, forested          |
| 11           | Riverine, regularly flooded, non-forested      |
| 12           | Riverine, seasonally flooded, forested         |
| 13           | Riverine, seasonally flooded, non-forested     |
| 14           | Riverine, seasonally saturated, forested       |
| 15           | Riverine, seasonally saturated, non-forested   |
| 16           | Palustrine, regularly flooded, forested        |
| 17           | Palustrine, regularly flooded, non-forested    |
| 18           | Palustrine, seasonally saturated, forested     |
| 19           | Palustrine, seasonally saturated, non-forested |
| 20           | Ephemeral, forested                            |
| 21           | Ephemeral, non-forested                        |
| 22           | Arctic or boreal peatland, forested            |
| 23           | Arctic or boreal peatland, non-forested        |
| 24           | Temperate peatland, forested                   |
| 25           | Temperate peatland, non-forested               |
| 26           | Tropical peatland, forested                    |
| 27           | Tropical peatland, non-forested                |
| 28           | Mangrove                                       |
| 29           | Saltmarsh                                      |
| 30           | Delta                                          |
| 31           | Other coastal wetland                          |
| 32           | Salt pan, saline or brackish wetland           |
| 33           | Paddy rice                                     |

**Table S1.** GLWDv2 classes. For more details about GLWDv2, see (Lehner et al., 2024).

| Class number | Class                                      |
|--------------|--------------------------------------------|
| 0            | no_data                                    |
| 10           | cropland_rainfed                           |
| 11           | cropland_rainfed_herbaceous_cover          |
| 12           | cropland_rainfed_tree_or_shrub_cover       |
| 20           | cropland_irrigated                         |
| 30           | mosaic_cropland                            |
| 40           | mosaic_natural_vegetation                  |
| 50           | tree_broadleaved_evergreen_closed_to_open  |
| 60           | tree_broadleaved_deciduous_closed_to_open  |
| 61           | tree_broadleaved_deciduous_closed          |
| 62           | tree_broadleaved_deciduous_open            |
| 70           | tree_needleleaved_evergreen_closed_to_open |
| 71           | tree_needleleaved_evergreen_closed         |
| 72           | tree_needleleaved_evergreen_open           |
| 80           | tree_needleleaved_deciduous_closed_to_open |
| 81           | tree_needleleaved_deciduous_closed         |
| 82           | tree_needleleaved_deciduous_open           |
| 90           | tree_mixed                                 |
| 100          | mosaic_tree_and_shrub                      |
| 110          | mosaic_herbaceous                          |
| 120          | shrubland                                  |
| 121          | shrubland_evergreen                        |
| 122          | shrubland_deciduous                        |
| 130          | grassland                                  |
| 140          | lichens_and_mosses                         |
| 150          | sparse_vegetation                          |
| 151          | sparse_tree                                |
| 152          | sparse_shrub                               |
| 153          | sparse_herbaceous                          |
| 160          | tree_cover_flooded_fresh_or_brakish_water  |
| 170          | tree_cover_flooded_saline_water            |
| 180          | shrub_or_herbaceous_cover_flooded          |
| 190          | urban                                      |
| 200          | bare_areas                                 |
| 201          | bare_areas_consolidated                    |
| 202          | bare_areas_unconsolidated                  |
| 210          | water                                      |
| 220          | snow_and_ice                               |

**Table S2.** ESA CCI Land Cover Classes. For more details see (ESA, 2017).

|                               | India | China | Indonesia | Bangladesh | Thailand | Vietnam |
|-------------------------------|-------|-------|-----------|------------|----------|---------|
| FAO                           | ~15%  | ~2-3% | ~5%       | ~9%        | ~1-2%    | ~5%     |
| MIRCA rainfed where slope >3% | 10%   | 5%    | 32%       | 2%         | 11%      | 19%     |

**Table S3.** Proportion of upland rice area to total rice area estimated by FAO (FAO, 2002) or estimated by categorizing MIRCA rainfed rice areas with the highest slope topography (slope > 3%). The 3% slope threshold was chosen so that the derived global area of upland rice paddies matched the FAO global estimate of upland rice paddies. Topography data come from Copernicus DEM (Fahrland, E., 2022) that have been averaged at 0.25° resolution.

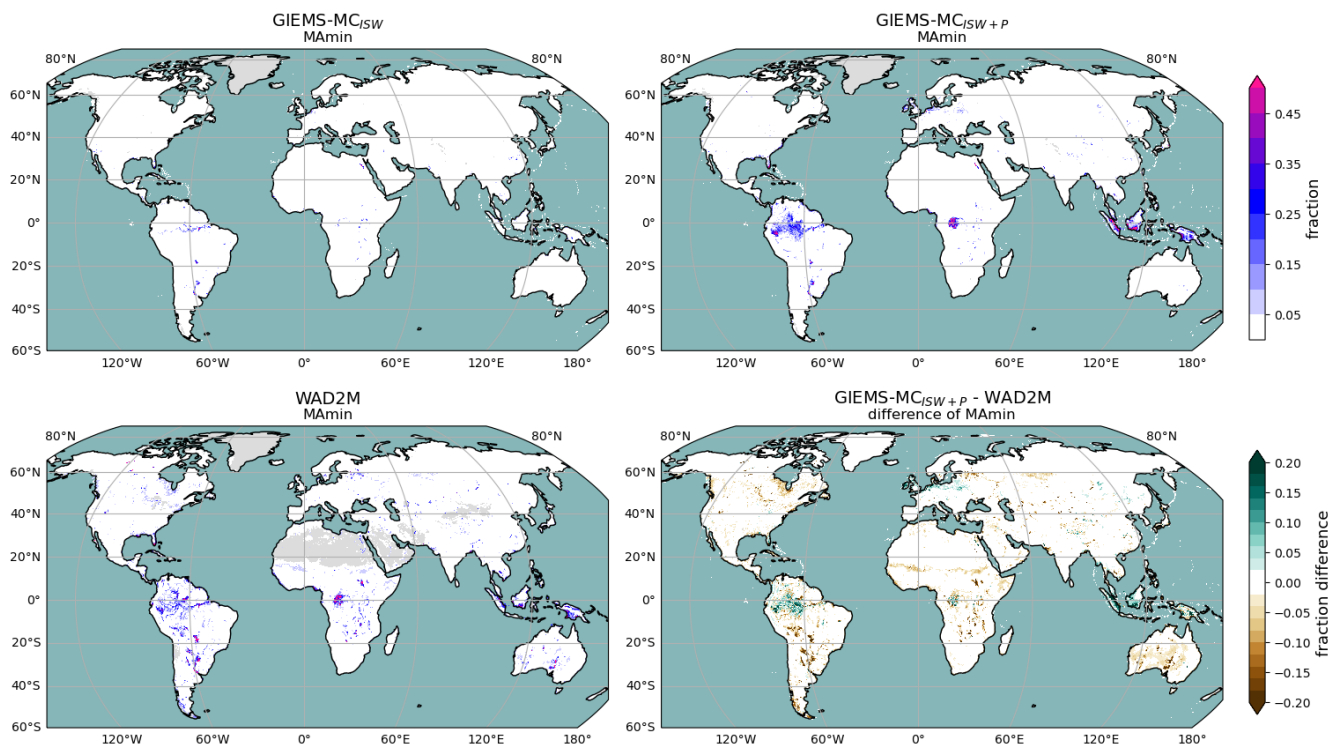

**Figure S1.** Global distribution of the Mamin of GIEMS-MC<sub>ISW</sub>, GIEMS-MC<sub>ISW+P</sub>, and WAD2M (Zhang et al., 2021), as well as the difference of Mamin from GIEMS-MC<sub>ISW+P</sub> and WAD2M.

## References

ESA: Land Cover CCI. Product User Guide Version 2.0, Tech. rep., ESA, 2017.

Fahrland, E.: ERA5-Land monthly averaged data from 1950 to present, 2022.

FAO: FAO Rice Information, Volume 3, FAO, 2002.

- 5 Lehner, B., Anand, M., Fluet-Chouinard, E., Tan, F., Aires, F., Allen, G. H., Bousquet, P., Canadell, J. G., Davidson, N., Finlayson, C. M., Gumbricht, T., Hilarides, L., Hugelius, G., Jackson, R. B., Korver, M. C., McIntyre, P. B., Nagy, S., Olefeldt, D., Pavelsky, T. M., Pekel, J.-F., Poulter, B., Prigent, C., Wang, J., Worthington, T. A., Yamazaki, D., and Thieme, M.: Mapping the world's inland surface waters: an update to the Global Lakes and Wetlands Database (GLWD v2), *Earth System Science Data Discussions*, 2024, 1–49, <https://doi.org/10.5194/essd-2024-204>, 2024.
- 10 Zhang, Z., Fluet-Chouinard, E., Jensen, K., McDonald, K., Hugelius, G., Gumbricht, T., Carroll, M., Prigent, C., Bartsch, A., and Poulter, B.: Development of the Global Dataset of Wetland Area and Dynamics for Methane Modeling (WAD2M), *Earth System Science Data*, 13, 2001–2023, <https://doi.org/10.5194/essd-13-2001-2021>, 2021.
